# Supplementary material for: The Effects of Chronic Exercise on Attentional Networks
Source: PubMed Central journal article supplement (PMC4092018; doi:10.1371/journal.pone.0101478), 2014-07-10
Supplement: pone.0101478.s001.pdf [file pone.0101478.s001.pdf]

# Appendix 1

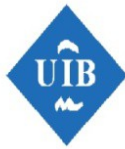

Universitat de les Illes Balears

---

Chief researcher: Pilar Andrés

Researcher: Laura Pérez & Concepción Padilla

Date: \_\_\_\_\_

|                             |  |                                          |  |
|-----------------------------|--|------------------------------------------|--|
| SURNAME: _____              |  | FIRST NAME: _____                        |  |
| Date of birth: _____        |  | Email Address: _____                     |  |
| Phone number: _____         |  | Availability: _____                      |  |
| Health problems: _____      |  | Heart rate: (Before) _____ (After) _____ |  |
| Weight (Kg): _____          |  | Height (whithout shoes): _____           |  |
| Rockport Test (Time): _____ |  |                                          |  |

**Please, answer the following questions explaining the kind of physical activity you have currently practiced. Try to specify as precise as possible the number of years, months and hours you have been doing sport.**

| Have you been doing exercise up to the present?                                                                                                      |          |       |            |       |            | YES   | NO         |
|------------------------------------------------------------------------------------------------------------------------------------------------------|----------|-------|------------|-------|------------|-------|------------|
| What kind of activity do you practice systematically?<br><br>Since when?<br><br>How many hours do you practice a day?<br><br>How many days per week? | Activity | Years | Hours/week | Years | Hours/week | Years | Hours/week |
|                                                                                                                                                      |          |       |            |       |            |       |            |
|                                                                                                                                                      |          |       |            |       |            |       |            |
|                                                                                                                                                      |          |       |            |       |            |       |            |

Have you done exercise in the PAST?

When? Please, specify the dates as much as possible.

What type of activity/ies?

How often have you practiced every one of them (years, months, days, hours)?
